# Supplementary material
Source: ML conference proceedings conference paper supplement (https://aclanthology.org/2022.emnlp-main.570)
Supplement: note [file 2022.emnlp-main.570.note.pdf]

Dear meta-reviewer, reviewers and ethics reviewer:

Thank you for the insightful comments, we have incorporated them in the body of the paper and the ethics statement. Below is a list of changes made to the paper:

1. To address comments from the ethics reviewer regarding data licensing and use, we have updated the ethics statement to include the links to the data usage agreements for both the datasets, and we have also included links to access request forms for each dataset, so that researchers who want to re-produce our results or build on top of our work can take appropriate steps to access the data.
2. To address concerns raised by reviewer 4 and ethics reviewer regarding releasing code, we have edited our introduction and ethics statement to reflect that we will not share the code publicly, and will only provide code to researchers who demonstrate proof of access to the data and wish to use the code for research purposes.
3. We have also updated our ethics statement to provide possible mitigations against membership inference attacks (such as the one proposed in this paper), including differential privacy and adversarial training.

Best regards,  
Authors of paper #2865
